# Supplementary material for: The Relationship Between Macrophages and Microvascular Density in the Microenvironment of Diffuse Large B-cell Lymphoma and Clinical Data
Source: Research Square preprint supplement (doi:10.21203/rs.3.rs-6577179/v1), 2025-05-13
Supplement: Supplementary file 1 [file 03bb84cbf68fe8ce4ab0824d.xlsx]

## Sheet: Sheet1
	gender	age	nod_ex.nodal	Extranodal	relaps	Ann_Arbor	survival	IPI_kod	IPIscore	abc/gcb	CD68	cd163	CD163_cd68_rate	mvd_21	>60 years old	MVD_Totale	MVD_
1	0	85	1	1	1	1	0	2	4	1	20	60	3	2	2	175	21.875
2	0	72	1	0	0	1	1	2		2	30	10	0.333	2	2	175	21.875
3	0	12	2				0			1	50	20	0.4	1	1	134	16.75
4	0	86	1	0	1	1	0	2	4	1	10	5	0.5	2	2	201	25.125
5	1	65	2	0	0	1	1	1	2	2	30	20	0.667	2	2	186	23.25
6	1	41	2	1	1	1	0	1	1	2	30	8	0.267	1	1	168	21
7	1	68	2	1	1	1	0	2		1	50	40	0.8	2	2	241	30.125
8	1	53	2	0	0	0	1	1	1	1	50	3	0.06	2	1	180	22.5
9	1	59	2	1	0	1	1	1	2	2	80	50	0.625	2	1	156	19.5
10	0	30	1				1			1	25	5	0.2	2	1	191	23.875
11	0	14	2				1			1	10	7	0.7	1	1	283	35.375
12	0	88	2	1	1	1	0	2	3	2	60	5	0.083	2	2	154	19.25
13	0	62	2	1	1	1	1	1	1	2	50	20	0.4	1	2	136	17
14	0	48	1	0	1	1	0	1	1	2	35	20	0.571	1	1	72	9
15	0	85	1	0	0	0	0	1	1	2	10	5	0.5	1	2	142	17.75
16	0	45	2	0	1	1	1	1	2	1	20	60	3	1	1	102	12.75
17	0	58	1	0	1	1	1	1	1	2	15	5	0.333	1	1	151	18.875
18	1	45	2	1	1	1	0	2	4	2	40	35	0.875	1	1	115	14.375
19	1	57	2	0	0	1	1	1	2	1	10	5	0.5	1	1	128	18.285
20	0	38	1	0	1	1	0	2	3	2	5	5	1	1	1	109	13.625
21	0	73	1	1	1	1	0	2	4	1	25	15	0.6	2	2	305	38.125
22	0	89	2	0	0	1	1	2	3	2	25	25	1	2	2	202	25.25
23	0	77	2	1	1	1	0	2	3	2	5	5	1	2	2	267	33.375
24	0	53	2	0	1	1	1	1	2	2	50	80	1.6	1	1	161	20.125
25	1	29	2	1	1	1	1	2	4	1	8	5	0.625	1	1	79	9.875
26	0	59	2	1	1	1	0	2	3	2	35	30	0.857	1	1	141	17.625
27	0	89	2	1	0	0	0	1	1	2	20	5	0.25	1	2	148	18.5
28	1	44	2	0	0	0	0	1		2	15	20	1.333	1	1	94	11.75
29	1	63	1	0	0	1	1	1	2	1	20	8	0.4	2	2	177	22.125
30	0	71	2	1	0	1	1	1	1	2	25	50	2	1	2	75	9.375
31	0	54	1	0	0	1	1	1	1	2	20	5	0.25	2	1	25	3.125
32	0	67	2	1	1	1	0	2	3	2	40	25	0.625	2	2	234	29.25
33	0	73	2	1	0	1	0	2	3	2	40	40	1	2	2	189	23.625
34	1	86	2	0	0	0	0	1	1	2	15	30	2	1	2	93	11.625
35	0	39	1	0	1	1	0	1	2	2	40	30	0.75	1	1	142	17.75
36	0	76	2	1	1	1	0	2	4	2	15	20	1.333	1	2	161	20.125
37	0	45	2	1	0	1	1	1	2	2	15	20	1.333	2	1	342	42.75
38	0	71	2	1	0	1	1	2	3	2	70	40	0.571	1	2	97	12.125
39	1	76	2	1	1	1	0	2	4	1	40	50	1.25	2	2	314	39.25
40	1	69	2	0	1	1	1	1	2	1	20	20	1	1	2	131	16.375
41	1	82	2	1	1	1	0	2	4	2	15	15	1	1	2	127	15.875
42	0	69	2	1	0	1	1	2	4	2	40	30	0.75	2	2	228	28.5
43	0	71	2	0	0	1	1	2	3	1	10	3	0.3	1	2	155	19.375
44	0	52	1	1	0	1	1	1	1	1	15	3	0.2	1	1	98	12.25
45	1	80	2	1	0	0	1	1	1	2	20	25	1.25	2	2	225	28.125
46	1	64	2	1	1	1	0	1	2	2	20	35	1.75	2	2	130	16.25
48	0	71	2	0	1	1	0	2		2	20	15	0.75	1	2	145	18.125
49	0	71	2	1	0	1	0	2		2	80	50	0.625	2	2	118	14.75
50	0	72	2				0			2	60	15	0.25	2	2	197	24.625
51	1	69	1	1	0	1	0	2	3	2	10	30	3	2	2	210	26.25
52	1	50	2	1	0	1	1	2	3	1	30	10	0.333	1	1	81	10.125
53	0	43	1	1	1	1	0	2	3	2	15	30	2	1	1	166	20.75
54	0	56	2				1			2	50	20	0.4	1	1	289	36.125
55	0	80	2	1	0	1	1	2	3	2	30	20	0.667	2	2	173	21.625
56	0	74	2	1	1	1	0	2	4	2	50	30	0.6	2	2	277	34.625
57	0	52	2	1	0	1	1	2	3	2	20	20	1	1	1	118	14.75
58	0	73	2				1			2	20	15	0.75	1	2	143	17.875
59	1	78	2				1			2	10	20	2	1	2	142	17.75
61	0	78	2				0			2	5	15	3	2	2	188	23.5
62	0	84	1	0	1	0	0	2	3	2	10	20	2	2	2	224	28
63	0	68	1	0	0	0	0	1		2	5	10	2	2	2	112	14
64	0	55	2	0	1	0	1	1	1	2	7	10	1.429	2	1	176	22
65	0	59	1	1	1	1	0	2		1	30	35	1.167	1	1	167	20.875
66	0	63	1	1	0	1	0	2		2	10	25	2.5	1	2	98	12.25
67	0	48	2	1	0	1	1	1	2	1	10	5	0.5	1	1	156	19.5
68	0	29	1	0	0	0	1	2		1	50	35	0.7	2	1	190	23.75
69	1	61	2	1	0	1	0	2		2	40	10	0.25	1	2	113	14.125
70	1	28	1	0	0	0	1	1	1	2	10	15	1.5	1	1	355	44.375
71	1	87	2	1	1	1	0	2		1	20	70	3.5	2	2	170	21.25
72	1	90	2				0			2	15	20	1.333	1	2	122	15.25
73	0	71	2	1	0	1	0	2		2	20	40	2	2	2	236	29.5
74	1	59	2	1	1	1	1	2	4	1	10	5	0.5	2	1	326	40.75
75	0	44	1	0	0	0	1	1	0	1	10	20	2	2	1	193	24.125
76	1	55	2	0	1	0	0	2		2	10	3	0.3	1	1	72	9
77	1	51	1	0	1	0	1	1		2	10	5	0.5	1	1	115	14.375
78	1	64	1	0	0	0	1	2		2	7	2	0.286	1	2	142	17.75
79	1	33	1	0	0	0	1	1		1	5	5	1	1	1	142	17.75
80	0	70	2	1	0	0	0	1		1	15	5	0.333	1	2	60	7.5
81	0	52	1	0	0	0	1	1		2	7	10	1.429	2	1	194	24.25
82	0	84	1	0	0	0	0	1		2	8	5	0.625	2	2	186	23.25
84	0	72	1				0			1	10	20	2	2	2	220	27.5
85	0	70	1	1	1	1	1	2	4	1	30	60	2	2	2	185	23.125
86	0	47	1				1			1	40	20	0.5	1	1	138	17.25
87	0	61	1				0			1	7	20	2.857	2	2	233	29.125
88	1	41	1	0	0	0	1	1		1	10	10	1	1	1	116	14.5
89	0	82	1	0	0	0	0	1		2	30	5	0.167	1	2	162	20.25
90	0	75	2	1	1	1	0	2		2	7	15	2.143	1	2	73	9.125
91	1	63	1	0	1	1	0	2	4	2	30	15	0.5	1	2	454	56.75
92	0	66	1	1	0	1	0	2		2	20	10	0.5	1	2	106	13.25
93	1	61	1	1	1	1	1	1		2	10	10	1	2	2	179	22.375
94	0	60	1				1			2	10	20	2	2	1	213	26.625
96	0	52	2	0	0	0	1	1		2	7	10	1.429	1	1	105	13.125
97	1	75	1	0	0	1	0	1	1	2	15	40	2.667	2	2	176	22
98	1	42	1	1	1	1	1	2		2	20	30	1.5	1	1	130	16.25
99	0	72	1				0			1	20	25	1.25	1	2	143	17.875
100	1	35	1	0	0	0	1	1		1	10	10	1	1	1	112	14
101	0	86	2	1	1	1	0	2		1	25	30	1.2	1	2	225	28.125
102	0	58	2				0			2	70	10	0.143	2	1	380	47.5
103	1	75	1	1	0	1	0	2		2	20	40	2	2	2	169	21.125
104	1	70	1	1	1	1	0	2		2	25	30	1.2	2	2	193	24.125
105	1	70	1	0	0	0	0	1		2	5	5	1	2	2	192	24
106	0	62	2	0	1	1	0	1	2	1	15	8	0.533	2	2	ÇALIŞMAMIŞ	13
107	0	62	1	0	0	0	1	1	1	1	20	20	1	1	2	318	39.75
108	1	60	1	1	0	1	0	2		2	10	50	5	1	1	175	21.875
109	1	67	2	0	0	0	1	1		2	20	5	0.25	1	2	80	10
110	1	82	1	1	1	1	0	2		2	40	80	2	1	2	127	15.875
111	0	51	2	0	0	1	1	1		1	20	5	0.25	1	1	76	9.5
112	0	62	2				1			1	10	30	3	1	2	165	20.625
113	0	40	1				1			1	15	40	2.667	2	1	183	22.875
114	0	46	2	0	0	0	1	1	0	1	20	30	1.5	2	1	165	20.625
115	0	58	1				1			2	30	50	1.667	2	1	213	26.625
116	1	73	1				0			1	15	2	0.133	1	2	119	14.875
117	0	73	2	1	0	0	0	2	3	1	10	10	1	1	2	92	11.5
118	0	38	1	0	0	0	1	1	1	1	20	50	2.5	1	1	103	12.875
119	1	53	1	0	0	0	1	1		1	5	8	1.6	1	1	261	32.625
120	1	32	1	0	0	0	1	1	0	1	20	30	1.5	1	1	137	17.125
121	0	58	1	0	1	1	1	2		2	20	15	0.75	1	1	128	16
122	0	39	2	0	0	0	1	1	1	1	7	10	1.429	1	1	293	36.625
123	1	58	1				1			1	5	5	1	2	1	189	23.625
124	0	60	2				0			2	50	20	0.4	1	1
125	0	55	1				1			2	10	5	0.5	1	1
126	0	59	2	1	0	1	0	2	3	2	10	5	0.5	2	1	282	35.25
